# Supplementary material for: SARS-CoV-2 Infection Is Asymptomatic in Nearly Half of Adults with Robust Anti-Spike Protein Receptor-Binding Domain Antibody Response
Source: PubMed Central journal article supplement (PMC7998869; doi:10.3390/vaccines9030207), 2021-03-02
Supplement: vaccines-09-00207-s001.pdf [file vaccines-09-00207-s001.pdf]

## Supplementary Materials

# SARS-CoV-2 Infection Is Asymptomatic in Nearly Half of Adults with Robust Anti-Spike Protein Receptor-Binding Domain Antibody Response

Ourania E. Tsitsilonis <sup>1,\*†</sup>, Dimitrios Paraskevis <sup>2,\*†</sup>, Evi Lianidou <sup>3</sup>, Evangelos Terpos <sup>4</sup>, Athanasios Akalestos <sup>5</sup>, Vassilios Pierros <sup>6</sup>, Evangelia Georgia Kostaki <sup>2</sup>, Efstathios Kastritis <sup>4</sup>, Paraskevi Moutsatsou <sup>7</sup>, Marianna Politou <sup>8</sup>, Andreas Scorilas <sup>1</sup>, Thomas Sphicopoulos <sup>6</sup>, Nikolaos Thomaidis <sup>3</sup>, Ioannis P. Trougakos <sup>1</sup>, Athanassios Tsakris <sup>9</sup>, Nikolaos Voulgaris <sup>10</sup>, Christina C. Daskalaki <sup>1</sup>, Zoi Evangelakou <sup>1</sup>, Christina Fouki <sup>2</sup>, Despoina D. Gianniou <sup>1</sup>, Sentiljana Gumeni <sup>1</sup>, Ioannis V. Kostopoulos <sup>1</sup>, Maria S. Manola <sup>1</sup>, Nikolaos Orogas-Stavrou <sup>1</sup>, Chrysanthi Panteli <sup>1</sup>, Eleni-Dimitra Papanagnou <sup>1</sup>, Pantelis Rousakis <sup>1</sup>, Aimilia D. Sklirou <sup>1</sup>, Stavroula Smilkou <sup>3</sup>, Dimitra Stergiopoulou <sup>3</sup>, Sotirios Tsiodras <sup>11</sup>, Meletios-Athanasios Dimopoulos <sup>4</sup> and Petros P. Sfikakis <sup>12</sup>

<sup>1</sup> Department of Biology, National and Kapodistrian University of Athens (NKUA), 15784 Athens, Greece; ascorilas@biol.uoa.gr (A.S.); itrougakos@biol.uoa.gr (I.P.T.); xristin1.dask@gmail.com (C.C.D.); zoievag@biol.uoa.gr (Z.E.); gndespoina@biol.uoa.gr (D.D.G.); sgumeni@biol.uoa.gr (S.G.); gikosto@gmail.com (I.V.K.); mmanola@biol.uoa.gr (M.S.M.); norologas@biol.uoa.gr (N.O.-S.); chrysanthipanteli23@gmail.com (C.P.); epapanagnou@biol.uoa.gr (E.-D.P.); rousakisp@gmail.com (P.R.); asklirou@biol.uoa.gr (A.D.S.)

<sup>2</sup> Department of Hygiene, Epidemiology and Medical Statistics, School of Medicine, NKUA, 11527 Athens, Greece; ekostakh@med.uoa.gr (E.G.K.); chrifouki@hotmail.com (C.F.)

<sup>3</sup> Department of Chemistry, NKUA, 15771 Athens, Greece; lianidou@chem.uoa.gr (E.L.); ntho@chem.uoa.gr (N.T.); ssmilkou@chem.uoa.gr (S.S.); dimitrastergiopoulou@yahoo.com (D.S.)

<sup>4</sup> Department of Clinical Therapeutics, School of Medicine, Alexandra General Hospital, NKUA, 11528 Athens, Greece; eterpos@med.uoa.gr (E.T.); ekastritis@med.uoa.gr (E.K.); mdimop@med.uoa.gr (M.-A.D.)

<sup>5</sup> Roche Diagnostics (Hellas) S.A., Marousi, 15125 Athens, Greece; thanasis.akalestos@roche.com

<sup>6</sup> Department of Informatics and Telecommunications, NKUA, 15784 Athens, Greece; pierrosv@di.uoa.gr (V.P.); thomas@di.uoa.gr (T.S.)

<sup>7</sup> Department of Clinical Biochemistry, School of Medicine, University General Hospital Attikon, NKUA, 12462 Haidari, Greece; pmoutsatsou@med.uoa.gr

<sup>8</sup> Hematology Laboratory-Blood Bank, Aretaieio Hospital, School of Medicine, NKUA, 11528 Athens, Greece; mpolitou@med.uoa.gr (M.P.)

<sup>9</sup> Department of Microbiology, School of Medicine, NKUA, 11527 Athens, Greece; atsakris@med.uoa.gr

<sup>10</sup> Department of Geology and Geoenvironment, NKUA, 15784 Athens, Greece; voulgaris@geol.uoa.gr

<sup>11</sup> Fourth Department of Internal Medicine, School of Medicine, University Hospital Attikon, NKUA, 12462 Haidari, Greece; sotirios.tsiodras@gmail.com

<sup>12</sup> First Department of Propaedeutic Internal Medicine, School of Medicine, Laiko General Hospital, NKUA, 15772 Athens, Greece; psfikakis@med.uoa.gr

\* Correspondence: rtsitsil@biol.uoa.gr (O.E.T.); dparask@med.uoa.gr (D.P.); Tel: +30-2107274215 (O.E.T.); +30-2107462119 (D.P.)

† The authors contributed equally.

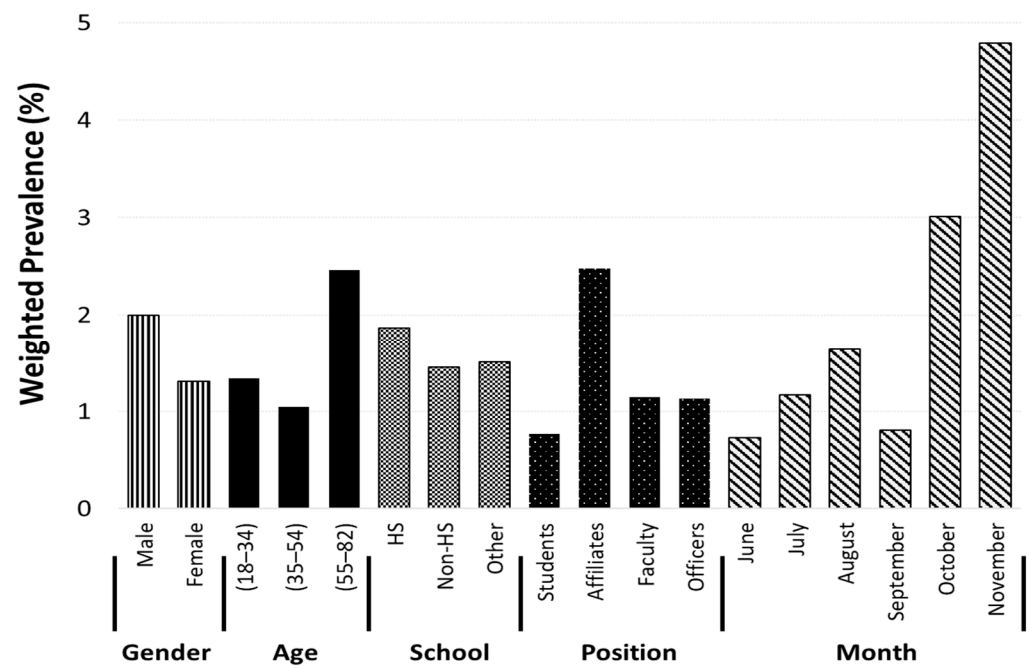

**Figure S1.** Weighted seroprevalence for age and test performance of anti-SARS CoV-2 N-protein per gender, age group (in years), School of NKUA (HS: Health Sciences, Non-HS: Non-health sciences), position at the NKUA and per month (June-November 2020).
